# Supplementary material
Source: publisher figshare collection journal article supplement (https://gsajournals.figshare.com/ndownloader/files/22365783)
Supplement: Supplementary file 1 [file 22365783]

**
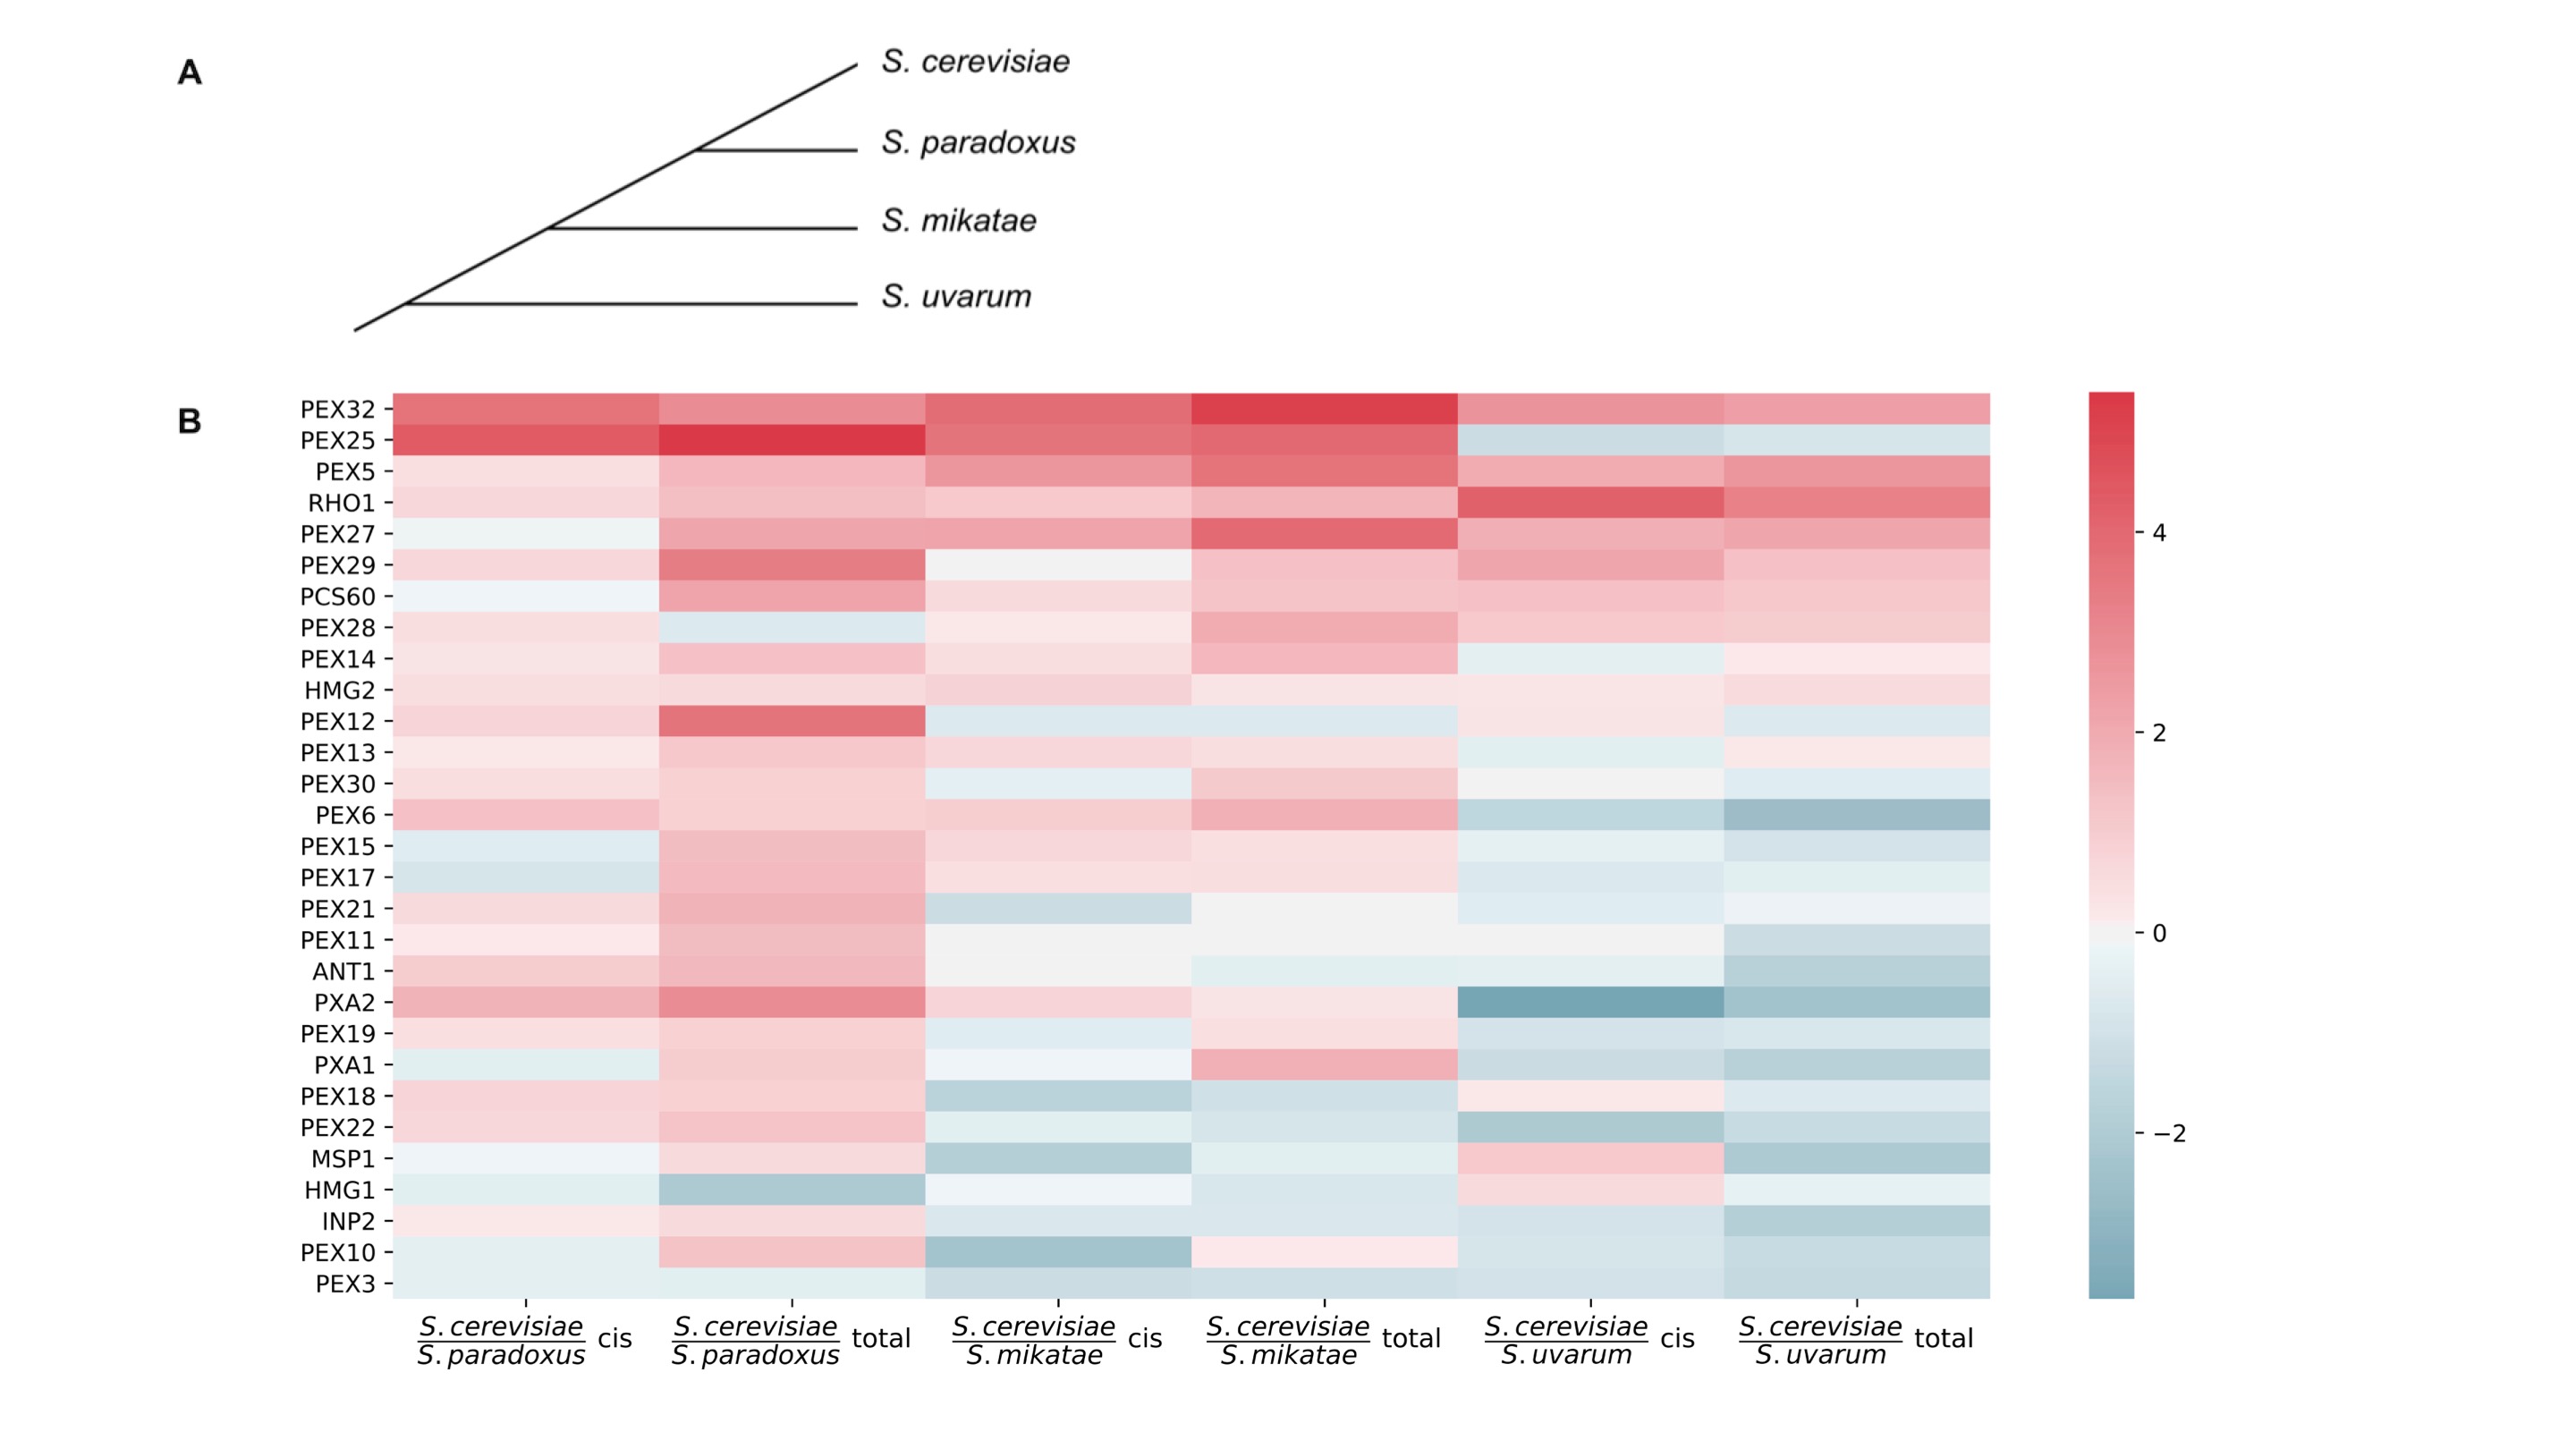
Figure S2: Expression divergence across *Saccharomyces* sensu stricto in peroxisome membrane genes**. Data are as in Figure 2 of the main text, except that comparisons of *S. cerevisiae* with *S. mikatae* and with *S. uvarum* are also shown.
